# Supplementary material for: Comparison of the laxative effects of KoreanGochujangcontaining different microbiota on loperamide-induced constipation in ICR mice
Source: Royal Society of Chemistry journal article supplement (doi:10.1039/d2fo04111a), 2023-01-01
Supplement: d2fo04111a1.pdf [file d2fo04111a1.pdf]

## Supplemental Figure S1 .

**A**

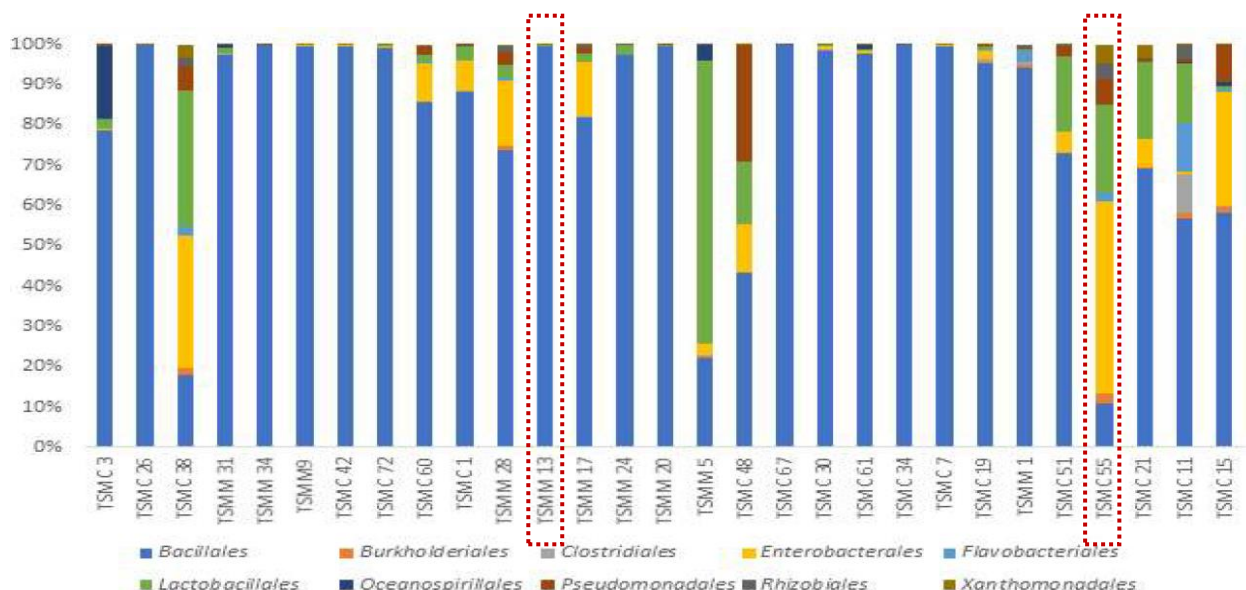

**B**

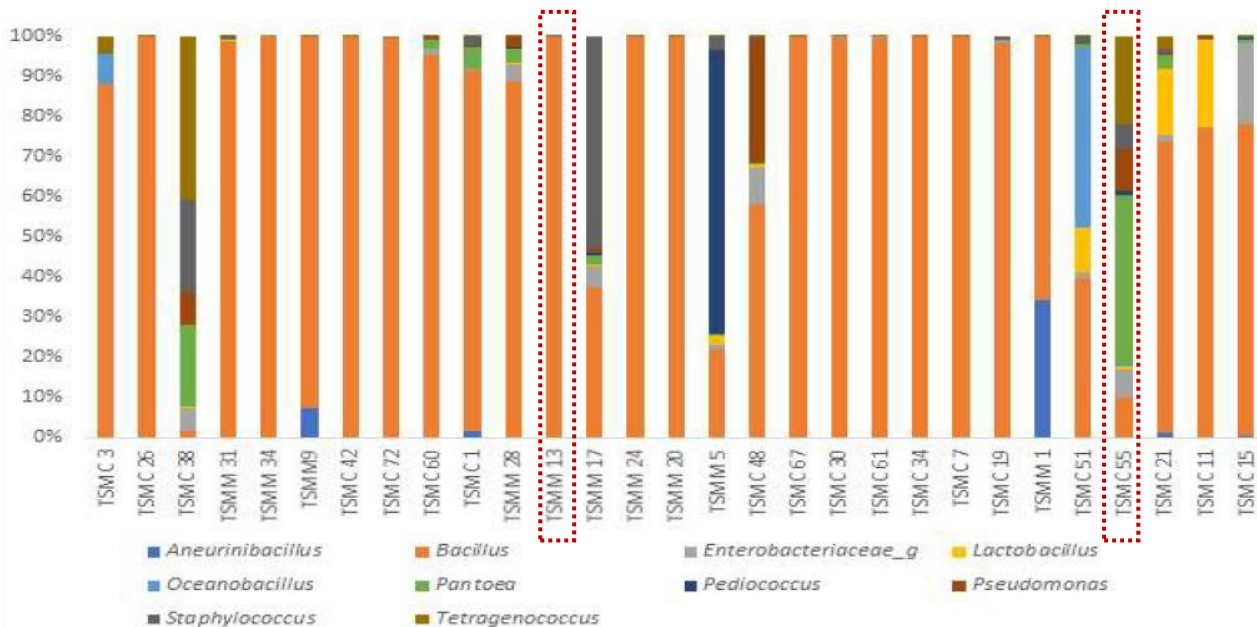

**Taxonomic Composition Analysis of 29 Candidate *Gochujang* for Screening ( $n = 1$  *Gochujang*).** (A) 29 kinds of *Gochujang* taxonomic composition at order level and (B) at genus level. TSMC13(BMG) was selected as the representative of *Gochujang* with a high proportion of beneficial microorganisms. TSMC55(VMG) was chosen as the representative of *Gochujang* having a greater variety of species.

## Supplemental Figure S2 .

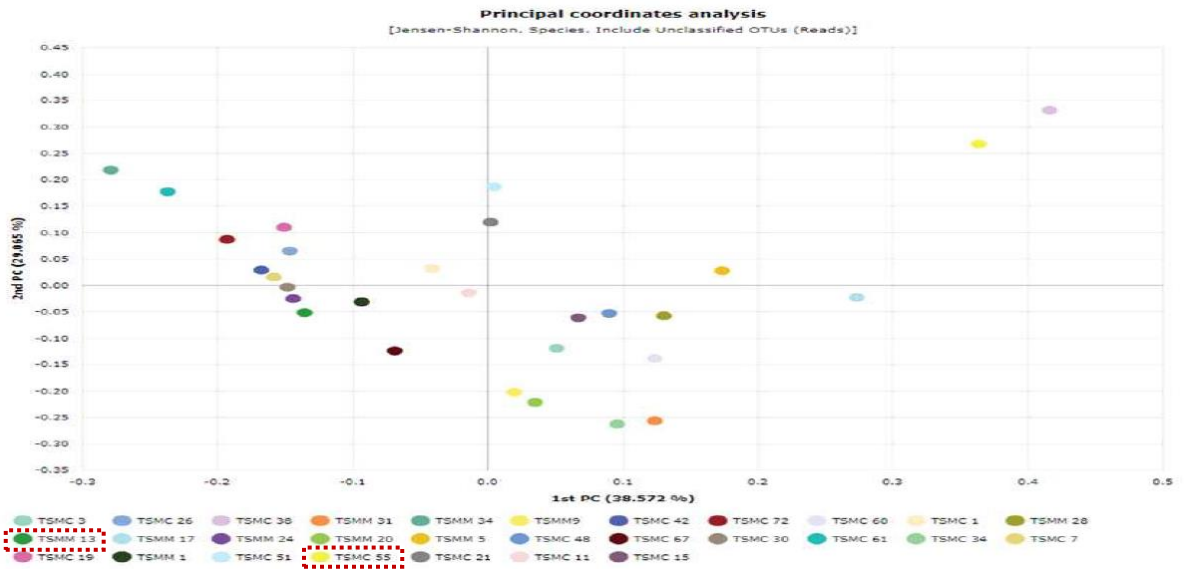

**Beta-diversity analysis of 29 kinds of *Gochujang* ( $n = 29$ ).** TSMC13(BMG) and TSMC(VMG) have different the structure of bacterial community.

## Supplemental Figure S3 .

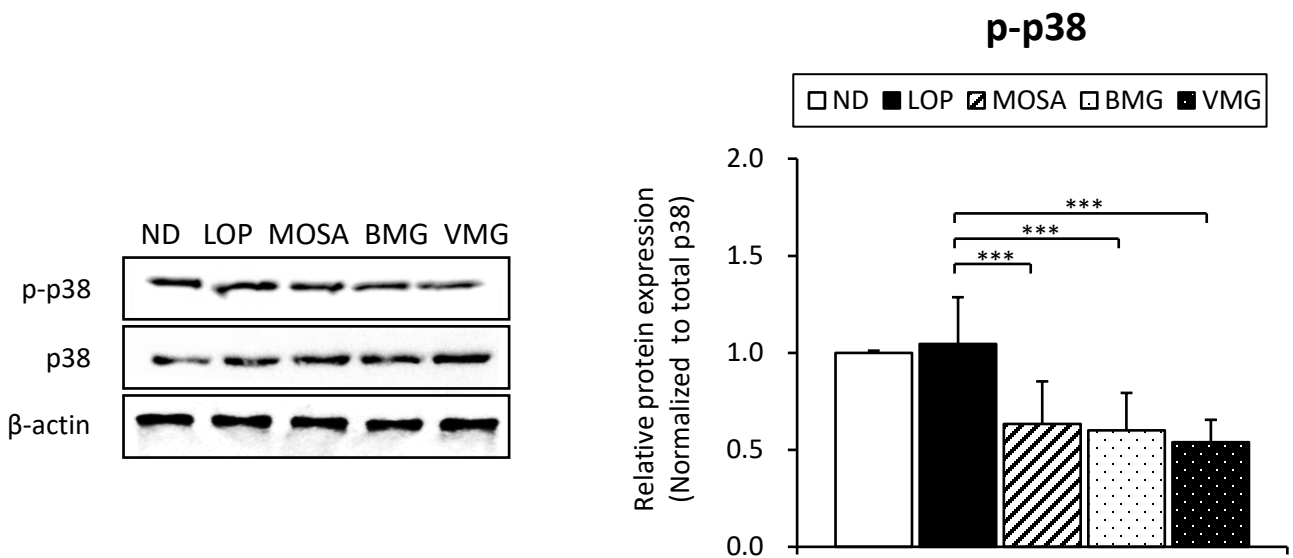

**Effect of BMG and VMG on proteins involved in MAPK signaling in the colon tissue of ICR mice with Lop-induced constipation.** Western blot bands of p-p38 and p38, and relative protein expression of p-p38. ND, nonconstipation group, LOP, loperamide (5 mg/kg BW) + vehicle-treated group, MOSA, loperamide (5 mg/kg BW) + mosapride citrate (3 mg/kg BW), BMG, loperamide (5 mg/kg BW) + BMG *Gochujang* (2 g/kg BW), VMG, loperamide (5 mg/kg BW) + VMG *Gochujang* (2 g/kg BW). Data were expressed as the mean  $\pm$  SD ( $n = 7$  mice per group). \*,  $p < 0.001$ , \*\*,  $p < 0.01$  and \*\*\*,  $p < 0.01$  were showed significant between different groups. Abbreviations: ICR, Institute of Cancer Research; Lop, loperamide; MAPK, mitogen-activated protein kinase; p-p38, phospho-p38 kinase.

**Supplemental Table S1.** Alpha-diversity analysis of 29 kinds of *Gochujang*

| No. | Sample name | Target reads | OTUs | CHAO    | Shannon | Phylogenetic diversity | Good's coverage of libraries (%) |
|-----|-------------|--------------|------|---------|---------|------------------------|----------------------------------|
| 1   | TSMC 1      | 91,231       | 74   | 80.43   | 2.27    | 185                    | 99.99                            |
| 2   | TSMC 5      | 60,166       | 266  | 288.86  | 1.91    | 358                    | 99.91                            |
| 3   | TSMC 9      | 73,279       | 141  | 168.75  | 1.02    | 207                    | 99.95                            |
| 4   | TSMC 13     | 98,480       | 158  | 193.05  | 1.36    | 301                    | 99.96                            |
| 5   | TSMC 17     | 54,885       | 470  | 545.96  | 2.05    | 686                    | 99.78                            |
| 6   | TSMC 20     | 99,492       | 73   | 84      | 0.62    | 128                    | 99.99                            |
| 7   | TSMC 24     | 94,360       | 126  | 136     | 1.69    | 204                    | 99.98                            |
| 8   | TSMC 28     | 19,877       | 242  | 259.18  | 2.61    | 426                    | 99.86                            |
| 9   | TSMC 31     | 98,076       | 61   | 74.2    | 0.78    | 128                    | 99.99                            |
| 10  | TSMC 34     | 96,738       | 115  | 136.12  | 1.39    | 151                    | 99.97                            |
| 11  | TSMC 1      | 84,179       | 238  | 257.38  | 2.65    | 366                    | 99.96                            |
| 12  | TSMC 3      | 93,917       | 152  | 173     | 2.54    | 291                    | 99.98                            |
| 13  | TSMC 7      | 96,767       | 88   | 97.56   | 0.95    | 167                    | 99.98                            |
| 14  | TSMC 11     | 61,895       | 2729 | 2866.38 | 4.86    | 3564                   | 99.29                            |
| 15  | TSMC 15     | 78,118       | 446  | 477.13  | 2.79    | 580                    | 99.9                             |
| 16  | TSMC 19     | 70,853       | 432  | 486.01  | 1.89    | 536                    | 99.84                            |
| 17  | TSMC 21     | 72,455       | 260  | 282.5   | 2.82    | 452                    | 99.95                            |
| 18  | TSMC 26     | 85,901       | 151  | 190.42  | 1.05    | 203                    | 99.95                            |
| 19  | TSMC 30     | 86,358       | 132  | 142.56  | 1.71    | 229                    | 99.98                            |
| 20  | TSMC 34     | 99,366       | 50   | 61.25   | 0.33    | 101                    | 99.99                            |
| 21  | TSMC 38     | 34,456       | 645  | 778.91  | 3.31    | 961                    | 99.49                            |
| 22  | TSMC 42     | 92,549       | 150  | 165     | 1.48    | 243                    | 99.97                            |
| 23  | TSMC 48     | 60,014       | 226  | 255.17  | 2.6     | 312                    | 99.92                            |
| 24  | TSMC 51     | 36,990       | 459  | 501.36  | 3.27    | 557                    | 99.75                            |
| 25  | TSMC 55     | 32,254       | 710  | 801.08  | 3.92    | 1041                   | 99.53                            |
| 26  | TSMC 60     | 28,832       | 196  | 255.11  | 1.58    | 334                    | 99.8                             |
| 27  | TSMC 61     | 75,904       | 173  | 194.5   | 1.26    | 292                    | 99.94                            |
| 28  | TSMC 67     | 98,675       | 54   | 67      | 0.83    | 118                    | 99.99                            |
| 29  | TSMC 72     | 84,905       | 207  | 241.45  | 1.54    | 297                    | 99.94                            |

**Supplemental Table S2.** The relative abundances of microorganisms in BMG at the species level

| Order             | Species                                  | Percentage | Order                     | Species                              | Percentage                     |
|-------------------|------------------------------------------|------------|---------------------------|--------------------------------------|--------------------------------|
| <i>Bacillales</i> | <i>Bacillus subtilis</i>                 | 92.77%     | <i>Burkholderiales</i>    | <i>Aquabacterium parvum</i>          | 0.01%                          |
|                   | <i>Bacillus hisashii</i>                 | 5.94%      | <i>Corynebacteriales</i>  | <i>Corynebacterium casei</i>         | 0.01%                          |
|                   | <i>Bacillus wiedmannii</i>               | 0.33%      | <i>Enterobacterales</i>   | <i>Proteus mirabilis</i>             | 0.01%                          |
|                   | <i>Brevibacillus borstelensis</i>        | 0.22%      |                           | <i>Enterobacter cloacae</i>          | 0.01%                          |
|                   | <i>Bacillus rhizosphaerae</i>            | 0.12%      | <i>Lactobacillales</i>    | <i>Lactobacillus rennini</i>         | 0.09%                          |
|                   | <i>Bacillus subterraneus</i>             | 0.07%      |                           | <i>Enterococcus hirae</i>            | 0.04%                          |
|                   | <i>Bacillus zhangzhouensis</i>           | 0.04%      |                           | <i>Lactococcus raffinolactis</i>     | 0.03%                          |
|                   | <i>Staphylococcus sciuri</i>             | 0.03%      |                           | <i>Leuconostoc mesenteroides</i>     | 0.01%                          |
|                   | <i>Bacillus chungangensis</i>            | 0.03%      | <i>Micrococcales</i>      | <i>Brevibacterium ravenpurgense</i>  | 0.03%                          |
|                   | <i>Bacillus smithii</i>                  | 0.01%      |                           | <i>Brevibacterium sediminis</i>      | 0.01%                          |
|                   | <i>Bacillus oleronius</i>                | 0.01%      |                           | <i>Oscillatoriales</i>               | <i>Aerosakkonema funiforme</i> |
|                   | <i>Bacillus zanthoxyli</i>               | 0.01%      | <i>Pseudomonadales</i>    |                                      | <i>Acinetobacter baumannii</i> |
|                   | <i>Kroppenstedtia eburnea</i>            | 0.01%      |                           | <i>Moraxella osloensis</i>           | 0.02%                          |
|                   | <i>Aneurinibacillus thermoaerophilus</i> | 0.01%      |                           | <i>Pseudomonas thermotolerans</i>    | 0.01%                          |
|                   | <i>Bacillus thermoamylovorans</i>        | 0.01%      |                           | <i>Pseudomonas deceptionensis</i>    | 0.01%                          |
|                   | <i>Sporosarcina saromensis</i>           | 0.01%      | <i>Sphingobacteriales</i> | <i>Sphingobacterium thermophilum</i> | 0.01%                          |
|                   | <i>Staphylococcus gallinarum</i>         | 0.01%      |                           | Other                                | 0.01%                          |
|                   | <i>Bacillus coagulans</i>                | 0.01%      |                           |                                      |                                |
|                   | <i>Bacillus plakortidis</i>              | 0.01%      |                           |                                      |                                |
|                   | <i>Exiguobacterium indicum</i>           | 0.01%      |                           |                                      |                                |

**Supplemental Table S3.** The relative abundances of microorganisms in VMG at the species level

| Order                           | Species                              | Percentage                      | Order                          | Species                               | Percentage                 |       |
|---------------------------------|--------------------------------------|---------------------------------|--------------------------------|---------------------------------------|----------------------------|-------|
| <i>Oscillatoriales</i>          | <i>Aerosakkonema funiforme</i>       | 66.93%                          |                                | <i>Pseudomonas deceptionensis</i>     | 0.10%                      |       |
| <i>Enterobacterales</i>         | <i>Enterobacter cloacae</i>          | 12.38%                          | <i>Pseudomonadales</i>         | <i>Pseudomonas composti</i>           | 0.03%                      |       |
|                                 | <i>Serratia nematodiphila</i>        | 0.51%                           |                                | <i>Pseudomonas xiamenensis</i>        | 0.03%                      |       |
|                                 | <i>Providencia thailandensis</i>     | 0.29%                           |                                | <i>Pseudomonas trivialis</i>          | 0.02%                      |       |
|                                 | <i>Rosenbergiella epipactidis</i>    | 0.11%                           |                                | <i>Acinetobacter baumannii</i>        | 0.02%                      |       |
|                                 | <i>Cronobacter sakazakii</i>         | 0.11%                           |                                | <i>Acinetobacter rudis</i>            | 0.01%                      |       |
|                                 | <i>Serratia quinivorans</i>          | 0.06%                           | <i>Xanthomonadales</i>         | <i>Xanthomonas nasturtii</i>          | 0.72%                      |       |
|                                 | <i>Pectobacterium carotovorum</i>    | 0.02%                           |                                | <i>Pseudomonas geniculata</i>         | 0.48%                      |       |
|                                 | <i>Pantoea vagans</i>                | 0.02%                           | <i>Rhizobiales</i>             | <i>Ochrobactrum pseudogrignonense</i> | 0.63%                      |       |
|                                 | <i>Escherichia fergusonii</i>        | 0.01%                           |                                | <i>Agrobacterium larrymoorei</i>      | 0.40%                      |       |
|                                 | <i>Proteus mirabilis</i>             | 0.01%                           |                                | <i>Paenochrobactrum gallinarii</i>    | 0.05%                      |       |
| <i>Rouxiiella chamberiensis</i> | 0.01%                                | <i>Methylorubrum populi</i>     |                                | 0.02%                                 |                            |       |
|                                 |                                      | <i>Ochrobactrum intermedium</i> |                                | 0.02%                                 |                            |       |
| <i>Lactobacillales</i>          | <i>Tetragenococcus halophilus</i>    | 5.18%                           |                                | <i>Aureimonas ureilytica</i>          | 0.01%                      |       |
|                                 | <i>Vagococcus penaei</i>             | 1.62%                           | <i>Burkholderiales</i>         | <i>Corticimicrobacter populi</i>      | 0.20%                      |       |
|                                 | <i>Leuconostoc mesenteroides</i>     | 0.41%                           |                                | <i>Alcaligenes aquatilis</i>          | 0.13%                      |       |
|                                 | <i>Enterococcus hirae</i>            | 0.32%                           |                                | <i>Bordetella bronchiseptica</i>      | 0.04%                      |       |
|                                 | <i>Weissella confusa</i>             | 0.21%                           |                                | <i>Lampropedia puyangensis</i>        | 0.03%                      |       |
|                                 | <i>Pediococcus stilesii</i>          | 0.20%                           |                                | <i>Kerstesia similis</i>              | 0.01%                      |       |
|                                 | <i>Weissella fabalis</i>             | 0.10%                           |                                | <i>Acidovorax soli</i>                | 0.01%                      |       |
|                                 | <i>Lactococcus lactis</i>            | 0.07%                           |                                | <i>Aquabacterium parvum</i>           | 0.01%                      |       |
|                                 | <i>Lactobacillus sakei</i>           | 0.07%                           |                                | <i>Verticella sediminum</i>           | 0.01%                      |       |
|                                 | <i>Facklamia tabacinasalis</i>       | 0.06%                           |                                | <i>Flavobacteriales</i>               | <i>Myroides odoratus</i>   | 0.13% |
|                                 | <i>Lactobacillus plantarum</i>       | 0.01%                           |                                |                                       | <i>Myroides injenensis</i> | 0.12% |
|                                 | <i>Lactobacillus brevis</i>          | 0.01%                           | <i>Myroides odoratimimus</i>   |                                       | 0.04%                      |       |
|                                 | <i>Lactobacillus homohiochii</i>     | 0.01%                           | <i>Flavobacterium ceti</i>     |                                       | 0.01%                      |       |
|                                 |                                      |                                 |                                | <i>Myroides xuanwuensis</i>           | 0.01%                      |       |
|                                 |                                      |                                 | <i>Wautersiella enshiensis</i> | 0.01%                                 |                            |       |
| <i>Bacillales</i>               | <i>Bacillus subtilis</i>             | 1.63%                           | <i>Micrococcales</i>           | <i>Leucobacter tardus</i>             | 0.11%                      |       |
|                                 | <i>Staphylococcus gallinarum</i>     | 0.93%                           |                                | <i>Microbacterium fluvii</i>          | 0.04%                      |       |
|                                 | <i>Staphylococcus sciuri</i>         | 0.35%                           |                                | <i>Brevibacterium sediminis</i>       | 0.02%                      |       |
|                                 | <i>Bacillus zhangzhouensis</i>       | 0.21%                           |                                | <i>Populibacterium corticicola</i>    | 0.02%                      |       |
|                                 | <i>Bacillus zanthoxyli</i>           | 0.17%                           |                                | <i>Arthrobacter echini</i>            | 0.01%                      |       |
|                                 | <i>Bacillus wiedmannii</i>           | 0.12%                           | <i>Leucobacter musarum</i>     | 0.01%                                 |                            |       |
|                                 | <i>Bacillus rhizosphaerae</i>        | 0.09%                           | <i>Corynebacteriales</i>       | <i>Corynebacterium terpenotabidum</i> | 0.05%                      |       |
|                                 | <i>Bacillus hisashii</i>             | 0.05%                           |                                | <i>Corynebacterium casei</i>          | 0.01%                      |       |
|                                 | <i>Bacillus plakortidis</i>          | 0.04%                           | <i>Erysipelotrichales</i>      | <i>Erysipelothrix inopinata</i>       | 0.05%                      |       |
|                                 | <i>Rummeliibacillus stabekisii</i>   | 0.02%                           | <i>Caulobacterales</i>         | <i>Brevundimonas olei</i>             | 0.01%                      |       |
|                                 | <i>Bacillus velezensis</i>           | 0.01%                           |                                | <i>Brevundimonas albigilva</i>        | 0.01%                      |       |
|                                 | <i>Lysinibacillus boronitolerans</i> | 0.01%                           | <i>Cellvibrionales</i>         | <i>Cellvibrio diazotrophicus</i>      | 0.02%                      |       |
|                                 | <i>Oceanobacillus timonensis</i>     | 0.01%                           | <i>Rhodospirillales</i>        | <i>Acetobacter orientalis</i>         | 0.02%                      |       |
|                                 | <i>Saccharibacillus endophyticus</i> | 0.01%                           | <i>Nostocales</i>              | <i>Loriellopsis cavernicola</i>       | 0.01%                      |       |
| <i>Macrocooccus canis</i>       | 0.01%                                | <i>Rhodobacterales</i>          |                                | <i>Falsirhodobacter halotolerans</i>  | 0.01%                      |       |
| <i>Pseudomonadales</i>          | <i>Pseudomonas oryzihabitans</i>     | 0.88%                           | Other                          |                                       | 2.10%                      |       |
|                                 | <i>Pseudomonas lactis</i>            | 0.55%                           |                                |                                       |                            |       |
|                                 | <i>Pseudomonas japonica</i>          | 0.16%                           |                                |                                       |                            |       |

**Supplemental Table S4.** Nutritional ingredients of BMG and VMG

|                             | <b>BMG</b> | <b>VMG</b> |
|-----------------------------|------------|------------|
| Calories (kcal/100g)        | 187.63     | 254.45     |
| Total Carbohydrate (g/100g) | 34.34      | 57.02      |
| Sugars (g/100g)             | 9.54       | 31.14      |
| Protein (g/100g)            | 6.11       | 3.96       |
| Total Fat (g/100g)          | 2.87       | 1.17       |
| Saturated Fat (g/100g)      | 0.09       | 0.04       |
| Trans Fat (g/100g)          | 0.00       | 0.00       |
| Cholesterol (mg/100g)       | Not Detect | Not Detect |
| Sodium (mg/100g)            | 2,665.64   | 3,185.48   |
